# Plasma Proteomic Profiling in HIV-1 Infected Methamphetamine Abusers

Gwenael Pottiez<sup>1</sup>, Teena Jagadish<sup>1</sup>, Fang Yu<sup>2</sup>, Scott Letendre<sup>3</sup>, Ronald Ellis<sup>3</sup>, Nichole A. Duarte<sup>3</sup>, Igor Grant<sup>3</sup>, Howard E. Gendelman<sup>1</sup>, Howard S. Fox<sup>1</sup>, Pawel Ciborowski<sup>1\*</sup>

<sup>1</sup> Department of Pharmacology and Experimental Neuroscience, Omaha, Nebraska, United States of America, <sup>2</sup> University of Nebraska Medical Center, Omaha, Nebraska, United States of America, <sup>3</sup> University of California San Diego, San Diego, California, United States of America

## Abstract

We wanted to determine whether methamphetamine use affects a subset of plasma proteins in HIV-infected persons. Plasma samples from two visits were identified for subjects from four groups: HIV+, ongoing, persistent METH use; HIV+, short-term METH abstinent; HIV+, long term METH abstinence; HIV negative, no history of METH use. Among 390 proteins identified, 28 showed significant changes in expression in the HIV+/persistent METH+ group over the two visits, which were not attributable to HIV itself. These proteins were involved in complement, coagulation pathways and oxidative stress. Continuous METH use is an unstable condition, altering levels of a number of plasma proteins.

**Citation:** Pottiez G, Jagadish T, Yu F, Letendre S, Ellis R, et al. (2012) Plasma Proteomic Profiling in HIV-1 Infected Methamphetamine Abusers. PLoS ONE 7(2): e31031. doi:10.1371/journal.pone.0031031

**Editor:** Fatah Kashanchi, George Mason University, United States of America

**Received:** October 14, 2011; **Accepted:** December 29, 2011; **Published:** February 16, 2012

**Copyright:** © 2012 Pottiez et al. This is an open-access article distributed under the terms of the Creative Commons Attribution License, which permits unrestricted use, distribution, and reproduction in any medium, provided the original author and source are credited.

**Funding:** This work was supported by National Institutes of Health grants P01DA026146, P30MH062261, P01NS043985, and P50 DA26306. The funders had no role in study design, data collection and analysis, decision to publish, or preparation of the manuscript.

**Competing Interests:** The authors have declared that no competing interests exist.

\* E-mail: pciborowski@unmc.edu

## Introduction

Methamphetamine (METH) is a widely abused drug worldwide [1], not only because of its general harmful effects on organ function and physiology, but also because its use can lead to the transmission of HIV and other infectious diseases. This commonly occurs through needle sharing and risky sexual behaviors [2,3]. The use of METH itself has adverse effects on the central nervous system (CNS) with a broad range of clinical outcomes [4]. The acute effects of METH depend on the amount of drug used and route of administration [5]. With longer term use, METH is neurotoxic, damaging dopaminergic nerve terminals, most profoundly in the striatum [6,7]. Long-term dopamine depletion and microglial activation is implicated in METH-induced neurotoxicity through reactive oxygen species, increased release of 5-hydroxytryptamine (5-HT), and loss of function in tryptophan hydroxylase and the serotonin transporter [7]. METH also has untoward actions on the immune system, yielding predominantly inhibitor effects [8,9,10]. Due to its effects on the immune and the central nervous systems, the multiple effects of METH are further complicated in the context of HIV-1 infection. When combined, METH use and HIV infection may have even more devastating effects [2,11,12,13].

Mechanisms underlying cognitive impairment resulting from HIV-1 infection and concurrent METH use are far from understood and diagnosis is currently limited to clinical evaluation and neurocognitive assessments [14]. During the last decade much experimental effort has been directed towards discovery of biomarkers in body fluids to aid in diagnosis and monitoring of neurocognitive disease, with a special emphasis on blood which is the easiest clinical sample to obtain. Protein biomarkers are an especially important target, and blood contains useful and unique proteomic

signatures – proteins and their fragments potentially changed due to pathological changes. However there are several obstacles in progress of discovery new biomarkers [15] such as linking particular biomarkers to pathology of disease and weakness of quantitation, therefore proper validation techniques of individual proteins is a very complex procedure [16]. We aimed to obtain clues to the effects of METH use on the blood plasma proteome. To accomplish this, our study was designed to capture changes in host responses following different durations of METH use or abstinence in HIV-infected individuals. We compared changes between two visits for in four groups of individuals. The first three groups consisted of HIV-infected METH users who either continued abusing METH (HIV+/persistent METH+), subjects who stopped METH and reported a short period (e.g., less than 12 weeks) of abstinence (HIV+/ST METH abstinent), or subjects who stopped METH and reported a longer period (e.g., at least 12 weeks) of abstinence (HIV+/LT METH abstinent). A fourth group consisted of uninfected controls who did not meet criteria for a METH use disorder and who reported no use of METH (HIV–/METH–). Among numerous methods used in proteomic profiling, we selected an isobaric tag for relative and absolute quantitation (iTRAQ) shotgun proteomic approach. This tandem mass spectrometry (MS/MS) profiling platform enables the quantification of identified peptides which is further translated to protein quantitation. Such large-scale acquisition and analysis can generate statistically significant valuable information with the ability to address existing questions and formulate new hypotheses, as successfully implemented here.

Profiling of samples from HIV+ individuals who report abstinence from METH may allow for a better understanding of the molecular mechanisms underlying reversible (short-term), and potentially non-reversible (long-term) effects, of METH use within the context of HIV-1.

## Materials and Methods

### Clinical samples

The University of California San Diego (UCSD) and University of Nebraska Medical Center Institutional Review Boards (IRB) approved the studies in which samples were collected, and the UCSD and UNMC IRBs approved their use in this study. Written informed consent was received from all participants. To ascertain whether subjects might have decisional impairment, a Decisional Capacity Assessment was administered. This consisted of an 11-item post-consent quiz with questions regarding the nature of the illness being studied, the voluntary nature of participation, and the ability to withdraw at any time, the consequences of withdrawing, the possible risks and benefits of participation, the procedures involved, the time required, confidentiality, and whom to call with any questions. Assistance with reading or understanding the vocabulary was provided. Inability to achieve a perfect score on the test or other serious indication of questionable capacity resulted in further evaluation by a clinical psychiatrist, psychologist, or neurologist. All subjects in this analysis achieved a perfect score on the test, indicating satisfactory demonstration of capacity.

All participants were ambulatory and underwent evaluation in the outpatient research center at UCSD. Eligibility criteria included the ability to undergo a structured clinical interview and to provide details of combined antiretroviral therapy (cART) use and substance use history.

Data were collected according to a standardized protocol of comprehensive neuromedical, neurobehavioral, and laboratory assessments as described previously [17]. Briefly, the following clinical parameters were evaluated using structured interviews and laboratory assessments where appropriate: cART use, including current and past exposure and HIV disease markers (plasma viral load and current and nadir CD4+ cell counts). Blood was collected by venipuncture and used to quantify plasma HIV viral loads by a commercial reverse transcription polymerase chain reaction assay (nominal lower quantitation limit, 50 copies/mL [Amplicor; Roche Diagnostic Systems, Indianapolis, Indiana]). Current CD4+ cell counts were measured by flow cytometry. Psychiatric diagnoses, including substance use disorders (abuse and dependence), were assessed using the computer assisted Composite International Diagnostic Interview (CIDI) [18,19], a fully structured clinical interview that is widely used in psychiatric research [20,21]. The CIDI classified current (within the last 30 days) and lifetime (>30 days ago) histories of METH use (e.g., abuse and dependence) disorders.

### Materials

Ammonium phosphate,  $\alpha$ -cyano-4-hydroxycinnamic acid (CHCA), trifluoroacetic acid (TFA) were from Sigma Aldrich (St. Louis, MO, USA). HPLC grade water and acetonitrile (ACN) were from Fisher Scientific (Pittsburg, PA, USA). NuPAGE 4–12% gels were from Invitrogen Corp. (Carlsbad, CA, USA). Ready Gel™ Blotting Sandwiches and glycine were from Bio-Rad (Hercules, CA, USA). Super Signal® West Pico chemiluminescent substrate was from Pierce (Rockford, IL, USA). Mouse monoclonal antibodies against vitamin D-binding protein (Abcam, Cambridge, MA, USA), and ceruloplasmin (BD Biosciences, San Jose, CA, USA) were used as primaries, for detection of secondary antibodies were polyclonal goat HRP-conjugated anti-mouse IgG (Jackson ImmunoResearch, West Grove, PA, USA).

### Sample processing

Samples had been stored at  $-80^{\circ}\text{C}$  from the time of collection until the time of shipment. Samples were shipped on dry ice from

UCSD to UNMC and, on arrival, remained frozen. HIV was inactivated in all samples by addition of 10  $\mu\text{l}$  of 10% Triton-X100 freshly made and 50  $\mu\text{l}$  of cocktail of protease inhibitors (Sigma-Aldrich St. Louis, MO) per 1 mL of sample. After 30 minutes samples were aliquoted and those unused were stored at  $-80^{\circ}\text{C}$ . Two hundred fifty microliters from each sample were filtered using 0.2  $\mu\text{m}$  spin filter and immunodepleted using an IgY14 column (Sigma-Aldrich) connected to a liquid chromatography systems HPLC to immunodeplete abundant plasma proteins: albumin,  $\alpha_1$ -antitrypsin, IgM, haptoglobin, fibrinogen,  $\alpha_1$ -acid glycoprotein, apolipoprotein A-I and A-II, Apolipoprotein B, IgG, IgA, transferrin,  $\alpha_2$ -macroglobulin and complement C3. Flow-through fractions containing unbound proteins were concentrated using Vivaspin 15R (Sartorius, Aubagne, France), according to the manufacturer protocol. Finally, protein concentration was determined with a NanoDrop spectrophotometer (Thermo Scientific, San Jose, CA).

### Trypsin digest and peptide labeling

Fifty micrograms of proteins were precipitated with ethanol. Briefly, we added 10 volumes of cold ethanol (200 proof) to each sample. Samples were incubated for 3 h at  $-20^{\circ}\text{C}$  and centrifuged at  $13000 \times g$  for 15 minutes at  $4^{\circ}\text{C}$ . Proteins pellets were washed with 1 ml of 70% ethanol and dried in SpeedVac (Thermo-Scientific). Subsequent solutions were provided with iTRAQ reagent kit (Applied Biosystem (ABI), Carlsbad, CA).

Dried proteins were solubilized with dissolution solution and proteins were denatured with 1  $\mu\text{l}$  of denaturant reagent. Proteins reduction with reducing reagent was performed for 1 h at  $60^{\circ}\text{C}$  and finally cysteine blocking solution was used to block cysteines during 10 minutes at room temperature.

Trypsin from ABI was reconstituted at 1  $\mu\text{g}/\mu\text{l}$  with milliQ water and 10  $\mu\text{g}$  of trypsin were added to each sample. Digestion was performed for 16 h at  $37^{\circ}\text{C}$ . After digestion, peptides were labeled with iTRAQ label reagent (ABI) at room temperature for 2 h and 8 samples, labeled with the different isobaric mass tags, were combined in one tube and dried with SpeedVac.

### iTRAQ labeled peptides processing

Having subsequent samples collected from the same individuals at various times allowed us to make comparisons between time points as well as across all groups. Because we had four groups and two time points per group, the 8-plex iTRAQ approach to quantify changes was the method of choice. Table 1 shows how samples were “scrambled” into four sets to remove tag labeling bias. Since Group 1, (HIV+/persistent METH+) had only four individuals, four samples were randomly chosen from those available in Groups 2, 3 and 4 (consisting of 8, 12 and 10 identified subjects, respectively). One set of samples utilized all eight iTRAQ tags and each was measured in a separate analytical run.

Samples were clarified using mix education exchange (MCX) column (Water Corp., Milford, MA). Label peptides were solubilized with 1 ml of 0.1% formic acid, passed through the column, then the column was first washed with 5% methanol, 0.1% formic acid solution and then with methanol HPLC grade. Peptides were eluted with 1.4%  $\text{NH}_4\text{OH}$  in methanol [22].

Samples were dried, reconstituted in 1.44 ml of 0.1% formic acid and supplemented with 1.44  $\mu\text{l}$  of OFFGEL solution for 360  $\mu\text{l}$  of peptides. Next, samples were fractionated based on their isoelectric point ( $pI$ ) using 3100 OFFGEL Fractionator (Agilent, Inc. Santa Clara, CA). OFFGEL strips were rehydrated for 15 minutes at room temperature with 40  $\mu\text{l}$  of OFFGEL solution.

**Table 1.** iTRAQ tag assignment for 4 biological replicates in experimental design.

| Sample set | Tag 113     | Tag 114     | Tag 115     | Tag 116     | Tag 117     | Tag 118     | Tag 119     | Tag 121     |
|------------|-------------|-------------|-------------|-------------|-------------|-------------|-------------|-------------|
| 1          | *P1, G2, V1 | P2, G4, V2  | P2, G4, V1  | P3, G1, V2  | P1, G2, V2  | P4, G3, V1  | P4, G3, V2  | P3, G1, V1  |
| 2          | P5, G2, V2  | P6, G3, V1  | P7, G1, V1  | P6, G3, V2  | P8, G4, V1  | P7, G1, V2  | P5, G2, V1  | P8, G4, V2  |
| 3          | P9, G3, V2  | P10, G1, V1 | P11, G2, V2 | P9, G3, V1  | P11, G2, V1 | P12, G4, V2 | P10, G1, V2 | P12, G4, V1 |
| 4          | P13, G4, V2 | P14, G2, V1 | P15, G1, V2 | P13, G4, V1 | P16, G3, V1 | P14, G2, V2 | P15, G1, V1 | P16, G3, V2 |

\*P = Patient; G = Group; V = Visit.

doi:10.1371/journal.pone.0031031.t001

Peptide samples were loaded onto strips, splitting them equally between all 12 wells. Separation was performed for 20,000 Vhrs.

Collected fractions were cleaned with C-18 spin columns, according to the manufacturer's protocol. Briefly, fractions were adjusted to 5% acetonitrile (ACN) and 0.5% trifluoroacetic acid (TFA) and passed through activated columns. Columns were washed twice with a 5% ACN, 0.5% TFA solution and peptides were eluted with a 70% ACN, 0.1% TFA solution. Peptides were finally dried and stored at  $-80^{\circ}\text{C}$  until further use.

#### Off line LC-MS/MS analysis

Subsequent fractionation of OFFGEL fractions was performed off-line using Tempo<sup>TM</sup> LC system with automatic high density spotting onto MALDI target plates. Peptides were solubilized in 20  $\mu\text{l}$  of 0.1% TFA and 10  $\mu\text{l}$  of samples were loaded onto a ProteoCol<sup>TM</sup> C18 trap cartridge (MichromBiosources, Auburn, CA) and washed for 20 minutes at 9  $\mu\text{l}/\text{min}$ . Gradient of separation was realized using a ratio between two buffers, Water:ACN:TFA (98:2:0.1) (Buffer A) and water:ACN:TFA (2:98:0.1) (Buffer B). To perform the separation, the subsequent gradient was applied, time 0 to 5 min 5 to 15% buffer B, 5–52 minutes 15–35%, 52–54 minutes 35–80%, 54–64 minutes 80%, 64–65 minutes 80–5% and 65–72 minutes 5%. Peptide elution was monitored with a UV cell at 214 nm absorbance. After the UV cell, eluted peptides were mixed with a matrix solution (1.2 mg/ml in 75% ACN and 0.1% TFA solution) at a flow rate 1  $\mu\text{l}/\text{minute}$  using a Harvard Apparatus syringe pump. Fractions were spotted every 30 seconds and voltage applied to the plate during spotting was 2.8 kV.

Spotted fractions were submitted for data acquisition on a 4800 MALDI-TOF/TOF mass spectrometer (ABI). MS spectra were acquired from 800 to 3000  $m/z$ , for a total of 1000 laser shots by an Nd-YAG laser operating at 355 nm and 200 Hz. Laser intensity remain fixed for all the analyses. MS/MS analyses were performed using 1 kV collision energy with air as CID gas. Metastable ions were suppressed, for a total of 1000 laser shots.

Protein identification and quantification were performed with ProteinPilot<sup>TM</sup> software using Paragon method. The search parameters were as follows: iTRAQ 8plex (peptide labeled), Methylthio alkylation of Cysteine, NCBI database restricted to *Homo sapiens*.

#### Statistical analysis

Protein/peptide abundance measures generated by iTRAQ were first pre-processed using ProteinPilot<sup>TM</sup> v2.0. The logarithm of the abundance measure was modeled as a function of animal, protein, peptide, tag and experimental condition. Four sets of samples were used to simultaneously collect data from eight

experimental conditions composed of two visits from four groups: Group 1: HIV+/persistent METH+, Group 2: HIV+/ST METH abstinent, Group 3: HIV+, LT METH abstinence, Group 4: HIV-/METH-. All available abundance records ( $N=77,159$ ) were normalized using an iterative back fitting procedure to remove the animal, protein and peptide effects. Comparison of the distribution of the protein/peptide normalized (log) abundance measures by experimental condition was restricted to records with ProteinPilot<sup>TM</sup> assessed "confidence" of at least 50%. The mixed model was fit on the normalized abundances of each protein to adjust for the correlation of the samples collected from the same subject. The abundances of each protein between two visits within the same group were compared, and the relative abundance and the p-values were calculated to evaluate the short/long term effects of METH within each group.

#### Western blot - validation

Western blot quantitation was done as previously described [22,23]. 1DE was performed using NuPAGE gel system (Invitrogen Corp.) in 4–12% gradient Bis-Tris gels under reducing conditions and transferred onto PVDF membrane. Chemiluminescent signal was detected using SuperSignal West Pico<sup>TM</sup> Chemiluminescent Substrate and recorded on Blue Lite X-ray film (ISCBioExpress, Kaysville, UT).

## Results

### Subjects

All subjects visited the research center at least two times during the study, which allowed us to measure changes in the plasma proteome between visits. Subject demographic and clinical characteristics are summarized in Table 2. Group 1 (HIV+/persistent METH+) has relatively few subjects due to the rarity of such individuals. METH users entering the study were offered resources for treatment for their drug abuse if requested (Groups 1, 2 and 3). The study took place in an outpatient setting in which sobriety/abstinence was not required, thus effects of discontinuation of METH, rather than initiation of METH, were observed. Blood was drawn during visits and first blood sample was taken at the first visit. This measure is indirect because it attempts to infer the effects of METH from its discontinuation rather than from its administration. On the other hand, it is sufficient given ethical guidelines because ethically the direct effects of transition from a normal state to one of METH abuse cannot be clinically studied.

### Protein identification and quantitation

Plasma proteomic profiling is made difficult by the presence of a number of abundant proteins, making examination of less

**Table 2.** Subject demographic, psychiatric, and clinical characteristics.

| Variables                                             | Group 1 (N = 4) |          | Group 2 (N = 8) |          | Group 3 (N = 12) |          | Group 4 (N = 10) |       |
|-------------------------------------------------------|-----------------|----------|-----------------|----------|------------------|----------|------------------|-------|
| <b>Demographics:</b>                                  |                 |          |                 |          |                  |          |                  |       |
| Age, years (mean, SD)                                 | 37.8            | ±8.9     | 38.1            | ±5.6     | 43.6             | ±9.0     | 38.4             | ±9.6  |
| Sex, % male (N, %)                                    | 3               | 75%      | 8               | 100%     | 12               | 100%     | 7                | 70%   |
| Education, years (mean, SD)                           | 10              | ±2.3     | 13              | ±1.9     | 14               | ±2.0     | 12.8             | ±2.3  |
| Ethnicity, % Caucasian, N, %)                         | 2               | 50%      | 7               | 88.0%    | 10               | 83.0%    | 5                | 50.0% |
| <b>Psychiatric Characteristics:</b>                   |                 |          |                 |          |                  |          |                  |       |
| METH Use Disorder (N, %) <sup>a</sup>                 |                 |          |                 |          |                  |          |                  |       |
| Lifetime (>30 days ago)                               | 4               | 100%     | 8               | 100%     | 12               | 100%     | 0                | 0%    |
| Current (≤30 days ago)                                | 2               | 50%      | 3               | 37.5%    | 0                | 0%       | 0                | 0%    |
| Age of 1st use of METH, years (mean, SD) <sup>b</sup> | 15.7            | ±4.0     | 24.3            | ±7.5     | 31.1             | ±30.0    | –                | –     |
| Days since last use of METH (mean, SD)                | 5.1             | ±3.0     | 5.0             | ±2.7     | 1174.2           | ±3395.0  | –                | –     |
| Total days used METH (mean, SD)                       | 527.0           | ±912.9   | 735.7           | ±2080.8  | 1100.3           | ±2624.7  | –                | –     |
| Total grams of METH used (mean, SD)                   | 5569.5          | ±9646.7  | 677.3           | ±1915.6  | 477.5            | ±889.5   | –                | –     |
| <b>Clinical Characteristics<sup>c</sup>:</b>          |                 |          |                 |          |                  |          |                  |       |
| On CART (N, %)                                        | 0               | 0%       | 5               | 63%      | 6                | 50%      | –                | –     |
| Plasma VL (median, IQR)                               | 4.3             | 2.4, 5.1 | 4.4             | 3.0, 5.2 | 1.7              | 1.7, 3.7 | –                | –     |
| Nadir CD4 (median, IQR)                               | 422             | 119, 953 | 181             | 23, 282  | 168              | 76, 385  | –                | –     |
| Current CD4 (median, IQR)                             | 579             | 209, 942 | 238             | 76, 427  | 416              | 323, 705 | –                | –     |

Abbreviations: CART = combination antiretroviral therapy; SD = standard deviation; VL = viral load log<sub>10</sub> copies/mL; IQR = interquartile range.

<sup>a</sup>METH use disorder defined as meeting DSM-IV criteria for METH abuse or dependence.

<sup>b</sup>These variables are restricted to METH+ subjects.

<sup>c</sup>These variables are restricted to HIV+ subjects.

doi:10.1371/journal.pone.0031031.t002

abundant proteins not feasible. Furthermore the sheer number of proteins and the large dynamic range of their concentrations further complicate analysis. Thus we used multidimensional separation techniques – immunodepletion of the 14 most abundant proteins, separation of peptides into bins by isoelectric points (pI), and then further separation of these pI-based bins by reverse phase liquid chromatography. We chose the iTRAQ method of quantitation, and then eliminating label bias by a scrambling strategy. The data from mass spectrometry analysis were analyzed separately for each sample set and the results of all samples sets were then combined, revealing the identification of a total of 390 proteins. Statistical analysis revealed that 28 proteins were significantly differentially expressed in the persistent METH users; these are listed in Table 3.

### Effect of persistent METH use and short and long term abstinence

The primary objective of this study was to gain insights into changes in plasma proteome induced by METH in HIV-infected individuals. The study was designed based on participants who successfully stopped using drugs of abuse, therefore observed effects measured such change, rather than change induced directly by drug administration. Changes between visits in all four groups are summarized in Table 4. Group 1 measures changes in proteome in HIV-infected individuals when METH was still used, revealing a large number of changed proteins between visits. Groups 2 (i.e., reported stopping using METH over the course of the study for between two to 12 weeks) and Group 3 (i.e., reporting having at least three months of abstinence) who showed relatively few changes between visits. Similarly Group 4 (e.g., not HIV-infected and did not use METH) did not show many changes, thus in normal individuals the proteome is relatively stable as measured

by our methods. Fig. 1 shows differences between visits for three selected proteins. Statistical significance (increase) was observed only in Group 1.

The paucity of changes in the measured proteomes between visits in Groups 2 and 3 indicated that METH use had limited effect of these proteins at the time of the first visit, since METH abstinence in the context of recent use at the first visit (Group 2) or a history of METH use (Group 3) did not result in changes; as the amount of change in the proteome did not differ from that found in controls who were HIV negative and did not use METH (Group 4). However, many changes were found in Group 1, consisting of the significant increase of twenty one proteins, and a decrease of one protein. This effect of METH is very likely due to a recurring insult from taking METH. This can be either due to the continued use of METH over this period, and/or recent METH use; the positive urinary toxicology used to identify METH use indicates its use within the last three days.

Figure 2 demonstrates that a specific subset of proteins, designated by the arrows, was differentially perturbed in HIV-infected persistent METH users (HIV+/persistent METH+). The majority of these proteins were increased in expression in association with persistent METH use. A smaller subset of proteins showed reduced expression. HIV positive individuals who discontinued METH use (Groups 2 and 3) showed profiles more similar to those of HIV negative METH negative subjects.

### Discussion

Use of METH is associated with multiple adverse health outcomes such as behavioral risks facilitating sexually transmitted diseases and mental health problems such as psychosis and depression [24,25]. A strong association between METH use and

**Table 3.** Summary of differentially expressed proteins with statistical significance.

| Protein names                                                    | NCBI accession number | UniProtKB accession number | pI  | MW (kDa) |
|------------------------------------------------------------------|-----------------------|----------------------------|-----|----------|
| Alpha 2 macroglobulin variant                                    | gi 167017130          | A8K2U0                     | 5.8 | 161.1    |
| Alpha-1-antichymotrypsin                                         | gi 1340142            | P01011                     | 5.5 | 49.8     |
| Alpha-2-glycoprotein 1, zinc-binding                             | gi 52790422           | P25311                     | 5.7 | 34.3     |
| Alpha-2-HS-glycoprotein (Fragment)                               | gi 7770227            | P02765                     | 6.4 | 22.7     |
| Alpha2-HS glycoprotein                                           | gi 2521983            | P022765                    | 5.4 | 39.4     |
| Antithrombin III                                                 | gi 179161             | P01008                     | 6.3 | 52.6     |
| Apolipoprotein B-100 precursor                                   | gi 28780              | P04114                     | 6.6 | 515.6    |
| C4A variant protein                                              | gi 443671             | P0COL4                     | 6.8 | 193.7    |
| cDNA FLJ55673, highly similar to Complement factor B             | gi 194384366          | B4E1Z4                     | 6.8 | 140.9    |
| cDNA FLJ56652, highly similar to Hemopexin                       | gi 221044726          | B7Z2Q4                     | 6.4 | 15.7     |
| Ceruloplasmin precursor                                          | gi 119599290          | P00450                     | 5.5 | 116.8    |
| Coagulation factor XI precursor                                  | gi 4503627            | P03951                     | 8.5 | 70.1     |
| Complement C5 preproprotein                                      | gi 38016947           | P01031                     | 6.1 | 188.3    |
| Fibrinogen gamma chain                                           | gi 70906437           | P02676                     | 5.7 | 49.5     |
| Group-specific component (vitamin D-binding protein)             | gi 34785355           | P02774                     | 5.3 | 52.9     |
| Guanine nucleotide regulatory protein                            | gi 404722             | Q14344                     | 8.1 | 44.1     |
| Hemopexin precursor                                              | gi 386789             | P02790                     | 6.6 | 51.4     |
| Immunoglobulin kappa light chain V                               | gi 21669423           | No UniProtKB number*       | 6.7 | 29.3     |
| Inter-alpha globulin inhibitor H2                                | gi 70778918           | P19823                     | 6.4 | 106.5    |
| Inter-alpha-trypsin inhibitor family heavy chain-related protein | gi 221042206          | B7Z544                     | 6.2 | 98.3     |
| Kininogen-1 isoform 2                                            | gi 156231037          | P01042                     | 6.3 | 72       |
| Leucine-rich alpha-2-glycoprotein 1                              | gi 21707947           | P02750                     | 6.5 | 38.2     |
| Plasminogenisoform 1 precursor                                   | gi 4505881            | P00747                     | 7.0 | 90.6     |
| PREDICTED: similar to immunoglobulin lambda-like polypeptide 1   | gi 239752604          | No UniProtKB number*       | 8.9 | 53.3     |
| Prothrombin; coagulation factor II                               | gi 1335344            | P00734                     | 5.5 | 69.3     |
| Putative uncharacterized protein DKFZp686G11190                  | gi 34365282           | Q6MZQ6                     | 8.3 | 52.0     |
| Recombinant IgG3 heavy chain                                     | gi 9857757            | No UniProtKB number*       | 8.4 | 89.0     |
| Vitamin D-binding protein/group specific component               | gi 455970             | P02774                     | 5.3 | 52.9     |

\*The protein sequences have no homolog sequence in UniProtKB database.  
doi:10.1371/journal.pone.0031031.t003

increased risk of HIV has been substantiated by multiple studies [25,26,27]. Despite treatment, HIV infection is associated with a significant degree of neurocognitive impairment in one out of every seven subjects [28]. In SIV infected rhesus monkeys, METH treatment led to immune changes as well as increased virus in the brain [29]. Therefore, it can be expected that the combined effects of HIV infection and METH use will have not only additive or perhaps synergistic adverse effects on the brain, but also will have a detrimental impact on many physiological functions [30] including the immune system. We postulated that such effects would be reflected by changes in plasma proteome. Alterations in the plasma can affect the brain via communications between the periphery and the CNS, as well as through breach of blood-brain barrier (BBB) that can occur in HIV infection as well as drug abuse.

Interestingly the majority of significant changes were observed between visits in Group 1, those who did not discontinue using METH. Two major pathways were affected. First, was the complement cascade. This system is usually activated by HIV-1 infection alone; here continued METH use leads to further increase of C4A and C5 components. Such an increase likely represents non-specific response to an insult [31,32]. The second

activated system was blood coagulation and up-regulation of plasminogen, fibrinogen and kininogen. It has been shown that one toxic effect of METH use is disseminated intravascular coagulation (DIC, consumptive coagulopathy), which is a pathological activation of coagulation mechanisms [33]. As the small clots consume coagulation proteins and platelets, normal coagulation is disrupted; normal blood flow to organs is disrupted and this can lead to abnormal bleeding [34]. None of the subjects in this analysis had DIC but reported use of METH, at least in the setting of concurrent HIV infection, appears to result in less severe activation of coagulation pathways.

Increased expression of ceruloplasmin and hemopexin can represent a response to modulate increases in oxidative stress resulting from HIV infection and METH use. We expected that in response to METH exposure oxidative stress should be significantly enhanced and be correlated to increased expression of antioxidant enzymes, similar to our findings in SIV infected monkeys administered a chronic METH regimen [35]. Ceruloplasmin is a copper-binding glycoprotein oxidizing  $Fe^{2+}$  to  $Fe^{3+}$  ferroxidase without releasing radical oxygen species. Its main reported function is transport of iron across the cell membrane; however, several recent reports link this protein to an overall

**Table 4.** Changes in plasma protein expression levels between visits in all groups.<sup>§</sup>

| Names                                                            | Group 1      | p-value | Group 2      | p-value | Group 3     | p-value | Group 4      | p-value |
|------------------------------------------------------------------|--------------|---------|--------------|---------|-------------|---------|--------------|---------|
| Alpha 2 macroglobulin variant                                    | 1.44         | <0.05   | -1.10        | NS      | 1.35        | NS      | 1.17         | NS      |
| Alpha-1-antichymotrypsin                                         | <b>2.09</b>  | <0.001  | -1.01        | NS      | <b>1.84</b> | <0.01   | <b>2.01</b>  | <0.01   |
| Alpha-2-glycoprotein 1, zinc-binding                             | -1.12        | NS      | <b>-1.94</b> | <0.05   | 1.02        | NS      | <b>-1.82</b> | <0.05   |
| Alpha-2-HS-glycoprotein (Fragment)                               | <b>3.86</b>  | <0.001  | -1.48        | NS      | 1.09        | NS      | -1.01        | NS      |
| Alpha2-HS glycoprotein                                           | <b>2.94</b>  | <0.001  | <b>-1.52</b> | NS      | 1.14        | NS      | 1.12         | NS      |
| Antithrombin III                                                 | <b>2.25</b>  | <0.001  | 1.02         | NS      | 1.43        | <0.05   | 1.08         | NS      |
| Apolipoprotein B-100 precursor                                   | 1.20         | NS      | 1.41         | NS      | <b>1.60</b> | <0.05   | 1.36         | NS      |
| C4A variant protein                                              | 1.44         | <0.005  | 1.06         | NS      | -1.04       | NS      | -1.27        | NS      |
| cDNA FLJ55673, highly similar to Complement factor B             | 1.33         | <0.05   | 1.15         | NS      | 1.44        | <0.005  | -1.32        | NS      |
| cDNA FLJ56652, highly similar to Hemopexin                       | <b>2.21</b>  | <0.001  | -1.13        | NS      | 1.24        | NS      | -1.15        | NS      |
| Ceruloplasmin precursor                                          | <b>1.65</b>  | <0.001  | -1.19        | NS      | 1.29        | NS      | -1.29        | NS      |
| Coagulation factor XI precursor                                  | <b>1.89</b>  | <0.05   | -1.31        | NS      | 1.42        | NS      | 1.01         | NS      |
| Complement C5 preproprotein                                      | <b>2.01</b>  | <0.05   | 1.30         | NS      | 1.28        | NS      | <b>1.83</b>  | NS      |
| Fibrinogen gamma chain                                           | -1.43        | NS      | -1.31        | NS      | <b>1.57</b> | NS      | <b>-1.61</b> | NS      |
| Group-specific component (vitamin D-binding protein)             | <b>3.05</b>  | <0.001  | -1.13        | NS      | <b>1.53</b> | NS      | -1.03        | NS      |
| Guanine nucleotide regulatory protein                            | <b>-2.63</b> | NS      | 1.27         | NS      | -1.50       | NS      |              | NS      |
| Hemopexin precursor                                              | <b>1.85</b>  | <0.001  | -1.13        | NS      | 1.30        | NS      | -1.06        | NS      |
| Immunoglobulin kappa light chain V                               | <b>1.82</b>  | <0.05   | -1.12        | NS      | 1.06        | NS      | 1.38         | NS      |
| Inter-alpha globulin inhibitor H2                                | <b>1.55</b>  | <0.05   | 1.11         | NS      | <b>1.70</b> | <0.05   | 1.14         | NS      |
| Inter-alpha-trypsin inhibitor family heavy chain-related protein | <b>1.99</b>  | <0.01   | -1.03        | NS      | <b>1.52</b> | NS      | -1.16        | NS      |
| Kininogen-1 isoform 2                                            | <b>1.58</b>  | <0.001  | 1.02         | NS      | 1.07        | NS      | 1.17         | NS      |
| Leucine-rich alpha-2-glycoprotein 1                              | <b>1.58</b>  | <0.05   | -1.11        | NS      | <b>1.82</b> | <0.05   | -1.03        | NS      |
| Plasminogenisoform 1 precursor                                   | <b>1.74</b>  | <0.005  | 1.00         | NS      | 1.12        | NS      | -1.19        | NS      |
| PREDICTED: similar to immunoglobulin lambda-like polypeptide 1   | <b>2.57</b>  | <0.01   | -1.39        | NS      | 1.21        | NS      | 1.18         | NS      |
| Prothrombin; coagulation factor II                               | <b>1.96</b>  | <0.001  | 1.08         | NS      | 1.20        | NS      | 1.06         | NS      |
| Putative uncharacterized protein DKFZp686G11190                  | <b>2.65</b>  | <0.005  | -1.33        | NS      | 1.32        | NS      | 1.26         | NS      |
| Recombinant IgG3 heavy chain                                     | <b>2.59</b>  | <0.05   | -1.28        | NS      | 1.36        | NS      | 1.21         | NS      |
| Vitamin D-binding protein/group specific component               | <b>2.37</b>  | <0.001  | -1.09        | NS      | 1.37        | NS      | -1.07        | NS      |

NS: p-value is not significant.

<sup>§</sup>- Changes are relative increases or decreases from the second visit compared to the first expressed as averaged for each group.

doi:10.1371/journal.pone.0031031.t004

protective response of the host during increase of an oxidative stress. Ceruloplasmin is produced in the liver and our findings suggest that its expression increases during periods of METH use. These changes may remit following cessation of METH use, explaining why we did not observe changes in ceruloplasmin expression in patients after short or long term METH abstinence. In our previous plasma and cerebrospinal fluid (CSF) profiling experiments of HIV-infected individuals we also found ceruloplasmin to be differentially expressed [23,36,37]. Interestingly, this protein was down regulated in CSF of subjects with HIV dementia whereas it was up-regulated in plasma, suggesting that the CSF-to-plasma ratio of ceruloplasmin may be an important correlate of HIV-associated neurocognitive impairment.

The observation that changes in the plasma proteome were largely limited to subjects who continued to use METH was also unexpected. Because of this, we could not confidently identify a signature of METH use versus METH abstinence. Continued use of METH is by its nature an unstable condition, and users "crash" after METH binges [38]. Similarly the plasma proteome changes we found in Group 1 were not consistent with adaptive long-term

changes, suggesting that METH use continues to lead to instability in normal physiology such as the complement and coagulation systems even during chronic use. It has to be noted that some of the subjects in Groups 2 and 3 were on treatment for HIV infection whereas none of those in Group 1 were treated for HIV. Our previous studies revealed that the proteome changes rapidly within the first two weeks of infection (acute phase) and comes back to background, especially if cART is implemented [22]. HIV-induced changes in proteome become obvious when viral infection is not well controlled and inflammation is on the rise. Therefore the relationship between METH use and HIV infection and the changes found in Group 1 is likely complex.

During the last decade of clinical and translational proteomics development much emphasis has been placed on technological development with expectations that more sensitive mass spectrometers and multi-level pre-fractionations will lead us to discovery of multiple new diagnostic biomarkers [39,40]. However, the reality showed that although cataloging hundreds or even thousands of proteins in plasma and CSF has become more and more routine, quantitation and validation techniques are lagging

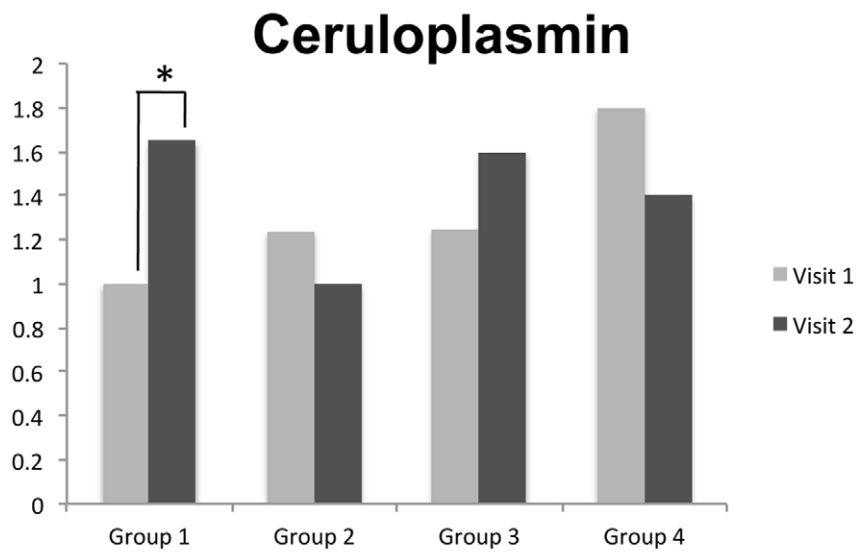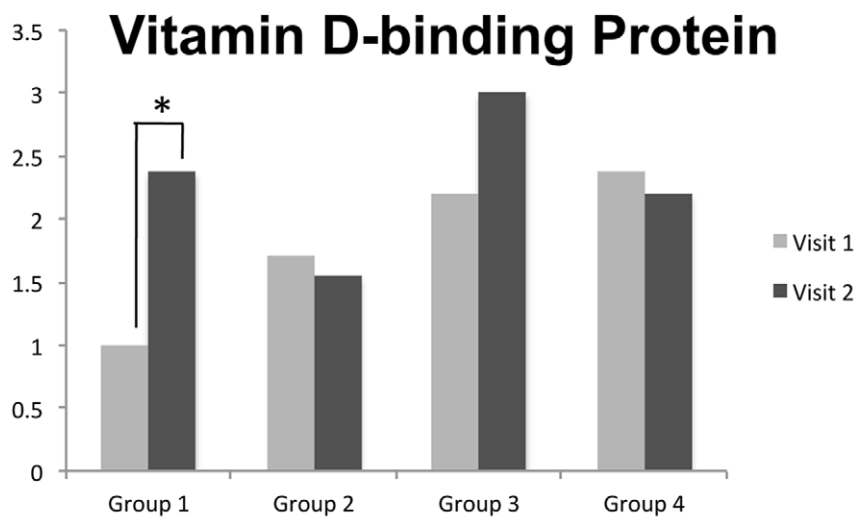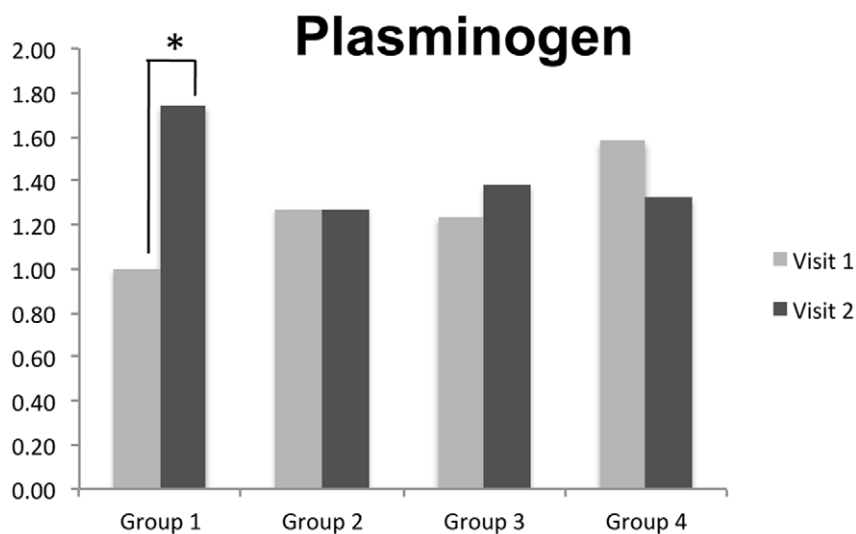

**Figure 1. Quantitative changes in expression of ceruloplasmin, vitamin D-binding protein and plasminogen.** Based on iTRAQ ratios, all three proteins showed significant increase from visit one to visit two in Group 1. No changes in other groups of subjects were found. doi:10.1371/journal.pone.0031031.g001

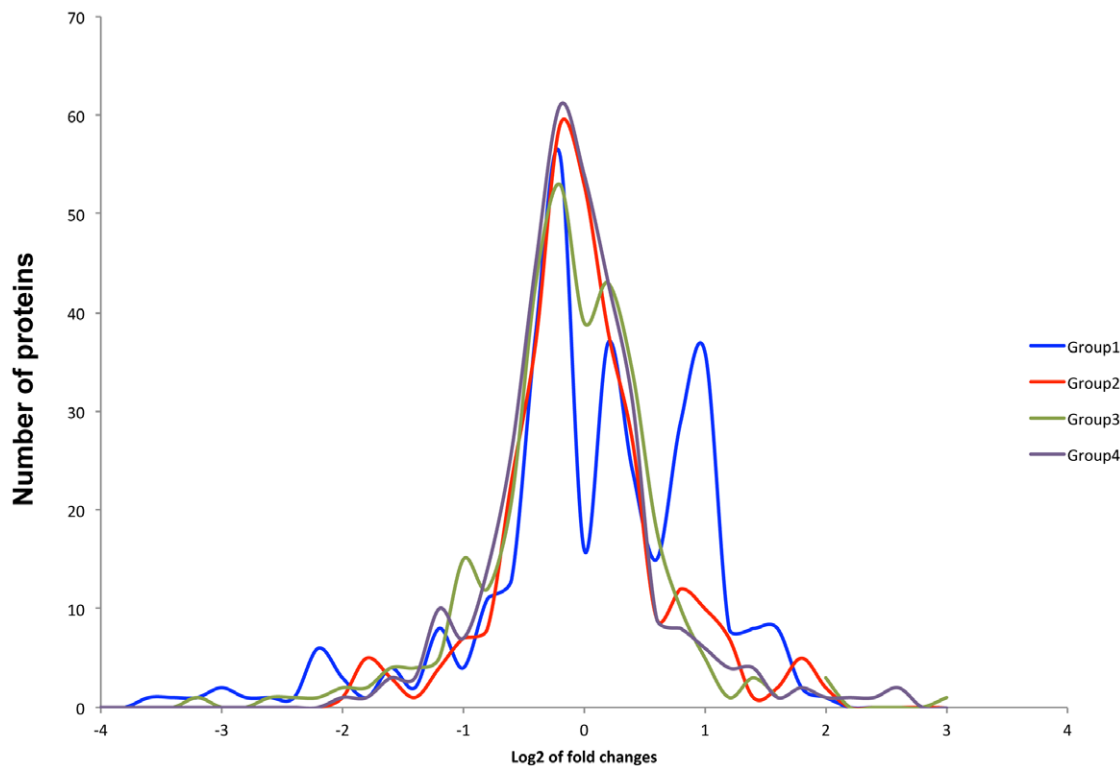

**Figure 2. Distribution of the Log<sub>2</sub> fold changes in proteins' expression in all groups.** It is expected that proteins will be distributed around log<sub>2</sub> of 0 (= 1, no change between visits). We observed two additional peaks in Group 1 indicated by arrowheads; larger peak with log<sub>2</sub> of 1 corresponding to 2-fold increase and smaller peak with log<sub>2</sub> of approximately -2 corresponding to 7-fold decrease.  
doi:10.1371/journal.pone.0031031.g002

[15,41]. This makes it more difficult to draw conclusions about how to connect differentially expressed proteins to biology of disease and to judge whether a potential biomarker is specific and directly relevant to the pathology in question [42,43]. Another layer of complexity is correlating genomic and proteomic data into one, synthesizing within a comprehensive and biologically meaningful scheme [44,45]. Much progress has been made in this area during the last decade when genomic and proteomic data from cellular proteins are compared. In the case of secreted proteins, especially those expressed by multiple tissues, such connections are even harder to make [45,46]. Also our knowledge about molecular mechanisms governing CNS and periphery communication is lagging and will require further investigations of BBB function to better interpret changes in proteomes of these two compartments. Considering studies performed so far [ref], there is no clear answer whether we should or should not expect such correlations and what they are indicative of biologically.

## Conclusions

Our study is the first report of systematic proteomic profiling of plasma samples, aiming to address the question of the effect of METH use or abstinence using well-defined groups of research subjects. Based on our results, we draw three conclusions for the effect METH use on the plasma proteome in the people living with HIV disease. First, changes in the hosts' responses to METH use may be short lived or require continued METH use to reach

detectable levels. Second, the effect of METH is reflected by changes in plasma proteins that are linked to oxidative stress and inflammation. Third, METH use perturbs blood coagulation pathways, with upregulation of plasminogen, fibrinogen and kininogen. Consumption of clotting factors in a coagulation cascade may result in an imbalance between pro- and anti-coagulation. This could in turn increase the risk of both ischemic and hemorrhagic end-organ disease. Recent epidemiological studies demonstrated substantial increases in intracerebral hemorrhage and myocardial infarction in young adults abusing METH [47], thus our work may provide insight into such complications of METH use, whether in the setting of HIV infection or in its absence.

## Acknowledgments

We would like to thank Ms. Jayme Wiederin and Ms. Robin Taylor at the University of Nebraska Medical Center for help in preparation of this manuscript. We also thank Melinda Wojtkiewicz from the Mass Core Facility at the University of Nebraska Medical Center for providing assistance with mass spectrometry analyses.

## Author Contributions

Conceived and designed the experiments: GP TJ FY SL RE NAD IG HEG HSF PC. Performed the experiments: GP TJ PC. Analyzed the data: GP FY NAD IG SL PC. Contributed reagents/materials/analysis tools: IG SL RE PC. Wrote the paper: GP HEG HSF FY NAD PC RE. Provided IRB protocols, clinical evaluations and collection of samples: IG SL RE.



## References

- Degenhardt L, Mathers B, Guarinieri M, Panda S, Phillips B, et al. (2010) Meth/amphetamine use and associated HIV: Implications for global policy and public health. *Int J Drug Policy* 21: 347–358.
- Scott JC, Woods SP, Matt GE, Meyer RA, Heaton RK, et al. (2007) Neurocognitive effects of methamphetamine: a critical review and meta-analysis. *Neuropsychol Rev* 17: 275–297.
- Letendre S, Paulino AD, Rockenstein E, Adame A, Crews L, et al. (2007) Pathogenesis of hepatitis C virus coinfection in the brains of patients infected with HIV. *J Infect Dis* 196: 361–370.
- Krasnova IN, Cadet JL (2009) Methamphetamine toxicity and messengers of death. *Brain Res Rev* 60: 379–407.
- Kiyatkin EA, Sharma HS (2009) Acute methamphetamine intoxication brain hyperthermia, blood-brain barrier, brain edema, and morphological cell abnormalities. *Int Rev Neurobiol* 88: 65–100.
- Cadet JL, Brannock C, Krasnova IN, Ladenheim B, McCoy MT, et al. (2010) Methamphetamine-induced dopamine-independent alterations in striatal gene expression in the 6-hydroxydopamine hemiparkinsonian rats. *PLoS One* 5: e15643.
- Thomas DM, Perez MA, Francescutti-Verbeem DM, Shah MM, Kuhn DM (2010) The role of endogenous serotonin in methamphetamine-induced neurotoxicity to dopamine nerve endings of the striatum. *J Neurochem*.
- Saito M, Terada M, Kawata T, Ito H, Shigematsu N, et al. (2008) Effects of single or repeated administrations of methamphetamine on immune response in mice. *Exp Anim* 57: 35–43.
- Talloczy Z, Martinez J, Joset D, Ray Y, Gacser A, et al. (2008) Methamphetamine inhibits antigen processing, presentation, and phagocytosis. *PLoS Pathog* 4: e28.
- Potula R, Hawkins BJ, Cenna JM, Fan S, Dykstra H, et al. (2010) Methamphetamine causes mitochondrial oxidative damage in human T lymphocytes leading to functional impairment. *J Immunol* 185: 2867–2876.
- Chana G, Everall IP, Crews L, Langford D, Adame A, et al. (2006) Cognitive deficits and degeneration of interneurons in HIV+ methamphetamine users. *Neurology* 67: 1486–1489.
- Cadet JL, Krasnova IN (2007) Interactions of HIV and methamphetamine: cellular and molecular mechanisms of toxicity potentiation. *Neurotox Res* 12: 181–204.
- Mahajan SD, Aalinkel R, Sykes DE, Reynolds JL, Bindukumar B, et al. (2008) Methamphetamine alters blood brain barrier permeability via the modulation of tight junction expression: Implication for HIV-1 neuropathogenesis in the context of drug abuse. *Brain Res* 1203: 133–148.
- Zetterberg H, Ruetschi U, Portelius E, Brinkmalm G, Andreasson U, et al. (2008) Clinical proteomics in neurodegenerative disorders. *Acta Neurol Scand* 118: 1–11.
- Silberring J, Ciborowski P (2010) Biomarker discovery and clinical proteomics. *Trends Anal Chem* 29: 128.
- Haverland N, Pottiez G, Wiederin J, Ciborowski P (2011) Immunoreactivity of anti-gelsolin antibodies: implications for biomarker validation. *J Transl Med* 8: 137.
- Rippeth JD, Heaton RK, Carey CL, Marcotte TD, Moore DJ, et al. (2004) Methamphetamine dependence increases risk of neuropsychological impairment in HIV infected persons. *J Int Neuropsychol Soc* 10: 1–14.
- Wittchen HU, Robins LN, Cottler LB, Sartorius N, Burke JD, et al. (1991) Cross-cultural feasibility, reliability and sources of variance of the Composite International Diagnostic Interview (CIDI). The Multicentre WHO/ADAMHA Field Trials. *Br J Psychiatry* 159: 645–653, 658.
- Wittchen HU (1994) Reliability and validity studies of the WHO-Composite International Diagnostic Interview (CIDI): a critical review. *J Psychiatr Res* 28: 57–84.
- Kessler RC, McGonagle KA, Zhao S, Nelson CB, Hughes M, et al. (1994) Lifetime and 12-month prevalence of DSM-III-R psychiatric disorders in the United States. Results from the National Comorbidity Survey. *Arch Gen Psychiatry* 51: 8–19.
- Robins LN, Regier DA (1991) *Psychiatric Disorders in America: The Epidemiologic Catchment Area Study*. New York: Free Press.
- Wiederin JL, Donahoe RM, Anderson JR, Yu F, Fox HS, et al. (2010) Plasma proteomic analysis of simian immunodeficiency virus infection of rhesus macaques. *J Proteome Res* 9: 4721–4731.
- Rozek W, Ricardo-Dukelow M, Holloway S, Gendelman HE, Wojna V, et al. (2007) Cerebrospinal fluid proteomic profiling of HIV-1-infected patients with cognitive impairment. *J Proteome Res* 6: 4189–4199.
- Clark T, Marquez C, Hare CB, John MD, Klausner JD (2010) Methamphetamine Use, Transmission Risk Behavior and Internet Use Among HIV-Infected Patients in Medical Care, San Francisco, 2008. *AIDS Behav*.
- Marshall BD, Werb D (2010) Health outcomes associated with methamphetamine use among young people: a systematic review. *Addiction* 105: 991–1002.
- Peck JA, Shoptaw S, Rotheram-Fuller E, Reback CJ, Bierman B (2005) HIV-associated medical, behavioral, and psychiatric characteristics of treatment-seeking, methamphetamine-dependent men who have sex with men. *J Addict Dis* 24: 115–132.
- Semple SJ, Zians J, Grant I, Patterson TL (2006) Sexual risk behavior of HIV-positive methamphetamine-using men who have sex with men: the role of partner serostatus and partner type. *Arch Sex Behav* 35: 461–471.
- Heaton RK, Clifford DB, Franklin DR, Jr., Woods SP, Ake C, et al. (2010) HIV-associated neurocognitive disorders persist in the era of potent antiretroviral therapy: CHARTER Study. *Neurology* 75: 2087–2096.
- Marcondes MC, Flynn C, Watry DD, Zandonatti M, Fox HS (2010) Methamphetamine increases brain viral load and activates natural killer cells in simian immunodeficiency virus-infected monkeys. *Am J Pathol* 177: 355–361.
- Newsome SD, Johnson E, Pardo C, McArthur JC, Nath A (2011) Fulminant encephalopathy with basal ganglia hyperintensities in HIV-infected drug users. *Neurology* 76: 787–794.
- Stoiber H, Kacani L, Speth C, Wurzner R, Dierich MP (2001) The supportive role of complement in HIV pathogenesis. *Immunol Rev* 180: 168–176.
- Perricone R, Fontana L, de Carolis C, Carini C, Sirianni MC, et al. (1987) Evidence for activation of complement in patients with AIDS related complex (ARC) and/or lymphadenopathy syndrome (LAS). *Clin Exp Immunol* 70: 500–507.
- Westover AN, Nakonezny PA, Haley RW (2008) Acute myocardial infarction in young adults who abuse amphetamines. *Drug Alcohol Depend* 96: 49–56.
- White SR (2002) Amphetamine toxicity. *Semin Respir Crit Care Med* 23: 27–36.
- Pendyala G, Trauger SA, Siuzdak G, Fox HS (2010) Quantitative plasma proteomic profiling identifies the vitamin E binding protein afamin as a potential pathogenic factor in SIV induced CNS disease. *J Proteome Res* 9: 352–358.
- Wiederin J, Rozek W, Duan F, Ciborowski P (2009) Biomarkers of HIV-1 associated dementia: proteomic investigation of sera. *Proteome Sci* 7: 8.
- Rozek W, Horning J, Anderson J, Ciborowski P (2008) Sera proteomic biomarker profiling in HIV-1 infected subjects with cognitive impairment. *Proteomics Clin Appl* 2: 1498–1507.
- Semple SJ, Patterson TL, Grant I (2003) Binge use of methamphetamine among HIV-positive men who have sex with men: pilot data and HIV prevention implications. *AIDS Educ Prev* 15: 133–147.
- Imai K, Koshiyama A, Nakata K (2011) Towards clinical proteomics analysis. *Biomed Chromatogr* 25: 59–64.
- Neilson KA, Ali NA, Muralidharan S, Mirzaei M, Mariani M, et al. (2011) Less label, more free: Approaches in label-free quantitative mass spectrometry. *Proteomics* 11: 535–553.
- Ciborowski P (2009) Biomarkers of HIV-1-associated neurocognitive disorders: challenges of proteomic approaches. *Biomark Med* 3: 771–785.
- Dowling P, Clynes M (2011) Conditioned media from cell lines: A complementary model to clinical specimens for the discovery of disease-specific biomarkers. *Proteomics* 11: 794–804.
- Raimondo F, Morosi L, Chinello C, Magni F, Pitto M (2011) Advances in membranous vesicle and exosome proteomics improving biological understanding and biomarker discovery. *Proteomics* 11: 709–720.
- Mertens I, Vandingenen A, Meeusen T, De Loof A, Schoofs L (2004) Postgenomic characterization of G-protein-coupled receptors. *Pharmacogenomics* 5: 657–672.
- Dunn BK, Jegalian K, Greenwald P (2011) Biomarkers for early detection and as surrogate endpoints in cancer prevention trials: issues and opportunities. *Recent Results Cancer Res* 188: 21–47.
- Fournier PE, Raoult D (2011) Prospects for the Future Using Genomics and Proteomics in Clinical Microbiology. *Annu Rev Microbiol*.
- Westover AN, McBride S, Haley RW (2007) Stroke in young adults who abuse amphetamines or cocaine: a population-based study of hospitalized patients. *Arch Gen Psychiatry* 64: 495–502.
